# Supplementary material for: DOT1L promotes angiogenesis through cooperative regulation of VEGFR2 with ETS-1
Source: PubMed Central journal article supplement (PMC5342507; doi:10.18632/oncotarget.11939), 2016-09-10
Supplement: oncotarget-07-69674-s001.pdf [file oncotarget-07-69674-s001.pdf]

## DOT1L promotes angiogenesis through cooperative regulation of VEGFR2 with ETS-1

### Supplementary Materials

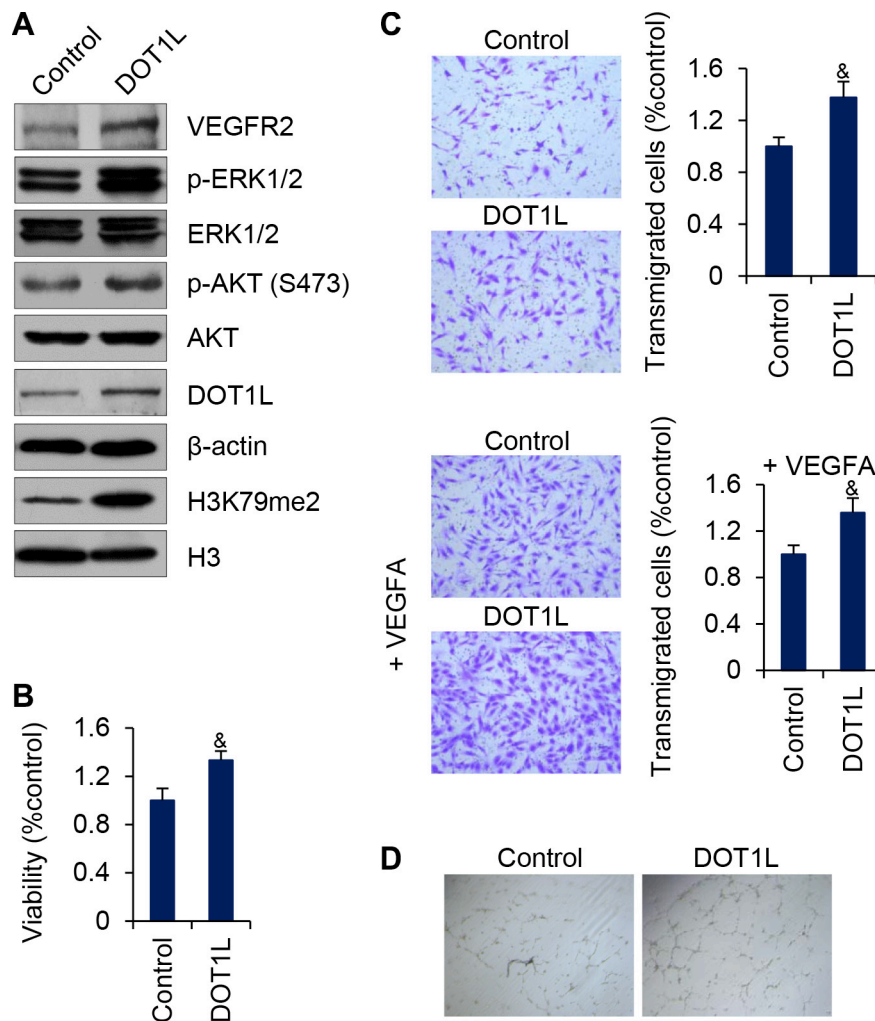

**Supplementary Figure S1: DOT1L overexpression increases VEGFR2 expression as well as cell viability, migration, and tube formation ability of HUVECs.** DOT1L expression constructs were transfected into HUVECs. (A) Western blotting was performed with indicated antibodies. (B) Cell viability was measured using MTT assay. Data are mean  $\pm$  SD for  $n = 3$ ,  $^*P < 0.05$  vs. control (Student's  $t$  test). (C) Transmigration of HUVECs was determined using transwell assays. Data are mean  $\pm$  SD for  $n = 3$ ,  $^*P < 0.05$  vs. control. (D) The matrigel network assay was detected *in vitro*.

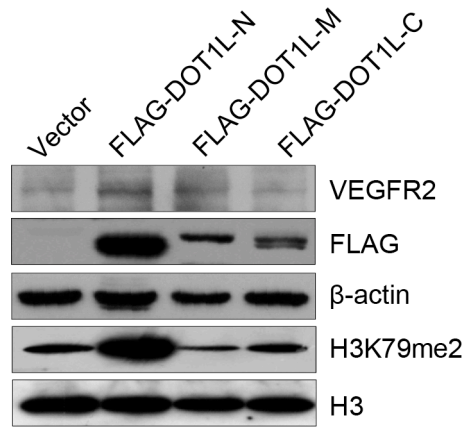

**Supplementary Figure S2: Overexpression of the N-terminal fragment of DOT1L increases the expression of VEGFR2.** DOT1L truncation expression constructs were transfected into HUVECs, and western blotting was performed with indicated antibodies.

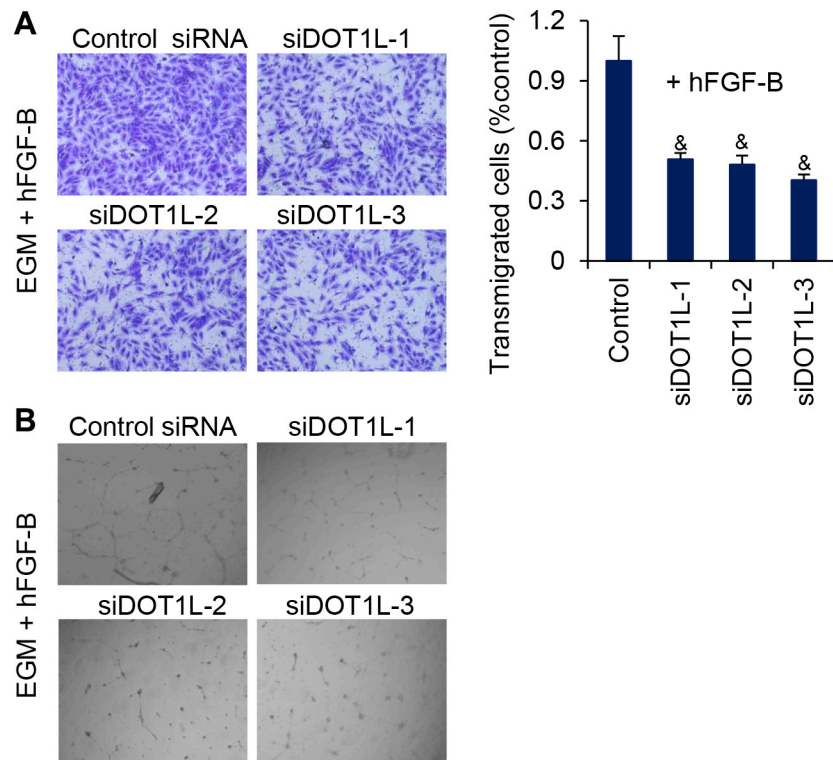

**Supplementary Figure S3: DOT1L silencing suppresses migration of HUVECs and tube formation in response to hFGF-B.** DOT1L was silenced in HUVECs by three different siRNAs (DOT1L-1, -2, and -3). (A) Migration of HUVECs towards hFGF-B was determined using transwell assays. The transmigrated cells were counted. Data are mean  $\pm$  SD for  $n = 3$ ; <sup>&</sup> $P < 0.05$  vs. control (Student's  $t$  test). (B) Endothelial tube formation capacity is shown.

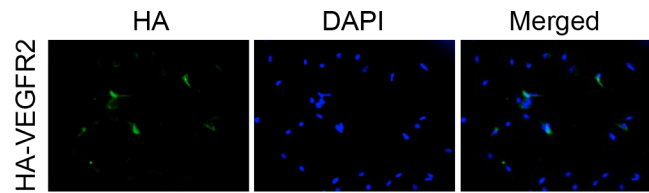

**Supplementary Figure S4: The efficiency of HA-VEGFR2 expression plasmids transfection was tested by immunofluorescence.** HUVECs transfected with HA-VEGFR2 expression plasmids were fixed and stained with anti-HA. Green, HA-VEGFR2. Blue, DAPI.

**Supplementary Table S1: Target genes occupied by H3K79me2 in HUVECs.** See Supplementary\_Table\_S1
